# Supplementary material for: One-pot hydrothermal synthesis of orange fluorescent silver nanoclusters as a general probe for sulfides
Source: Royal Society of Chemistry journal article supplement (doi:10.1039/c4an00505h), 2014-01-01
Supplement: c4an00505h1.pdf [file c4an00505h1.pdf]

Supplementary Information

*for*

**One-pot hydrothermal synthesis of orange fluorescent silver  
nanoclusters as a general probe for sulfides**

Jing Lan<sup>a</sup>, Pu Zhang<sup>c</sup>, Ting Ting Wang<sup>a</sup>, Yong Chang<sup>b</sup>, Shao Qing Lie<sup>b</sup>, Zhu Lian

Wu<sup>b</sup>, Zhong De Liu<sup>a</sup>, Yuan Fang Li<sup>b</sup>, Cheng Zhi Huang<sup>a, b, \*</sup>

*<sup>a</sup> Key Laboratory of Luminescent and Real-Time Analytical Chemistry (Southwest University), Ministry of Education, College of Pharmaceutical Sciences, <sup>b</sup> College of Chemistry and Chemical Engineering, Southwest University, Chongqing 400715, PR China, <sup>c</sup> College of Physical Science and Technology, Southwest University, Chongqing 400715, PR China*

Tel: +86-23-68254659

E-mail address: [chengzhi@swu.edu.cn](mailto:chengzhi@swu.edu.cn).

---

\* Corresponding author. Tel.: +86-23-68254659; Fax: +86-23-68367257.

E-mail address: [chengzhi@swu.edu.cn](mailto:chengzhi@swu.edu.cn) (C. Z. Huang)

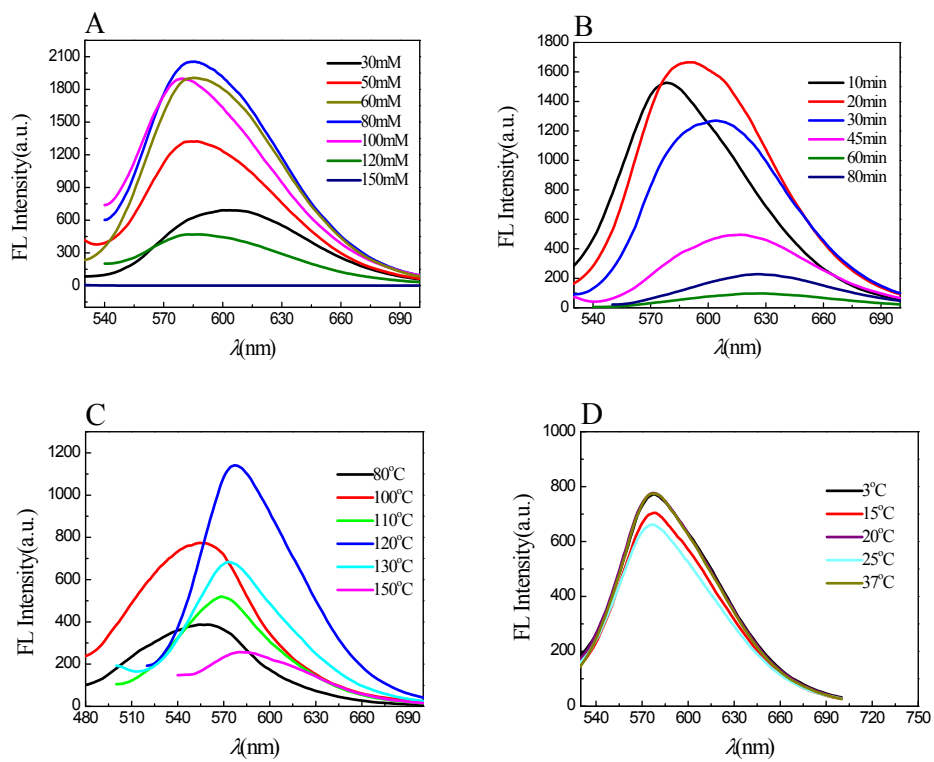

**Fig. S1** Relationship between fluorescence properties of PMAA-AgNCs and conditions:

(A).the concentration of  $\text{Ag}^+$ , (B).reaction time, (C).reaction temperature, (D).mixing temperature.

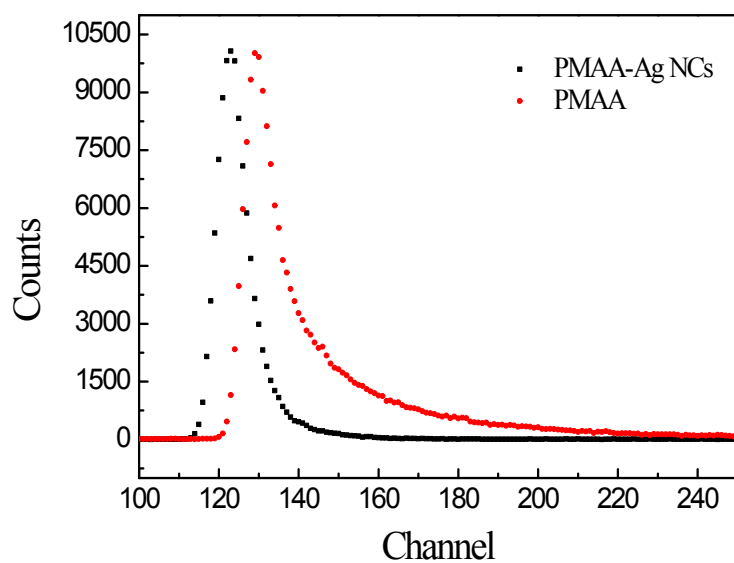

**Table 1** Fluorescence lifetimes calculated with two exponential fit of the photoluminescence decays of PMAA-AgNCs

|             | $\tau_1$ ns | $\tau_2$ ns | $A_1\%$ | $A_2\%$ | $\tau_{fit}$ ns |
|-------------|-------------|-------------|---------|---------|-----------------|
| PMAA        | 0.996       | 6.97        | 47.52   | 52.48   | 4.13            |
| PMAA-Ag NCs | 0.604       | 1.75        | 74.04   | 25.96   | 0.902           |

**Fig. S2** The fluorescence decay curves of PMAA (red) and PMAA-Ag NCs (black).

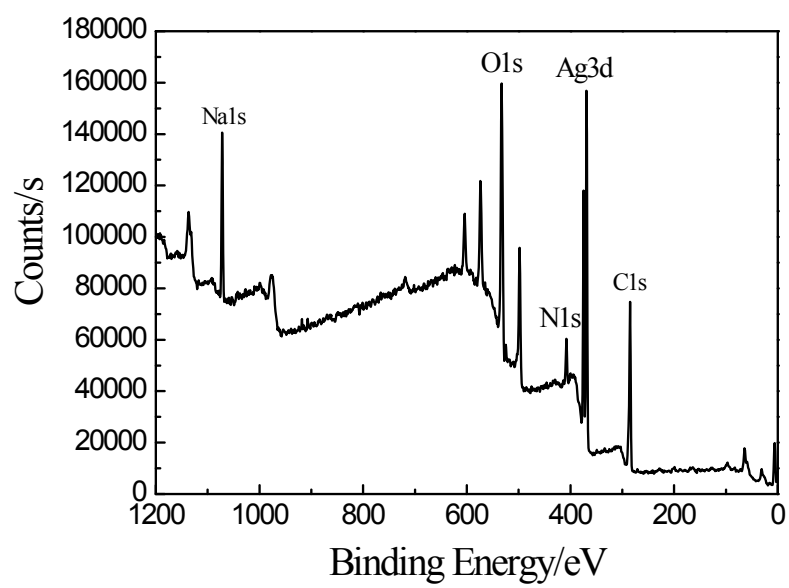

**Fig. S3** The XPS of as-prepared PMAA-AgNCs.

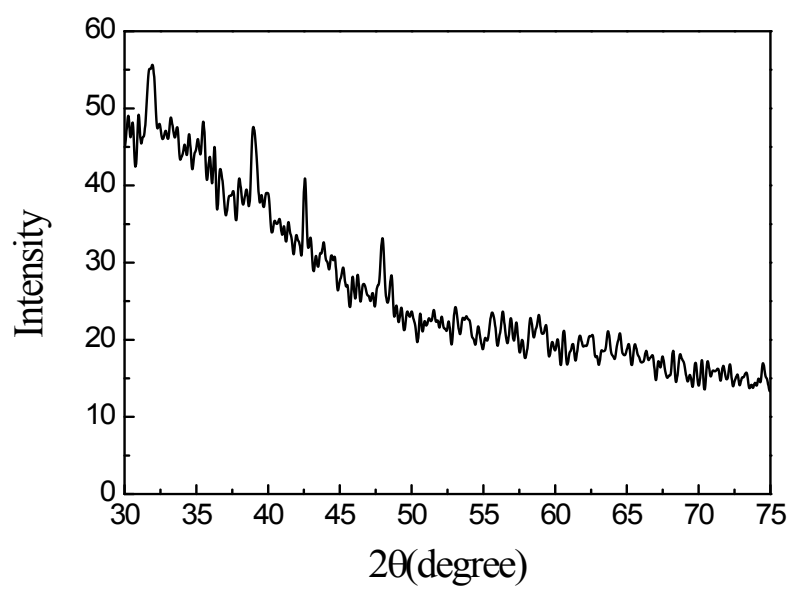

**Fig. S4** The XRD of as-prepared PMAA-AgNCs.

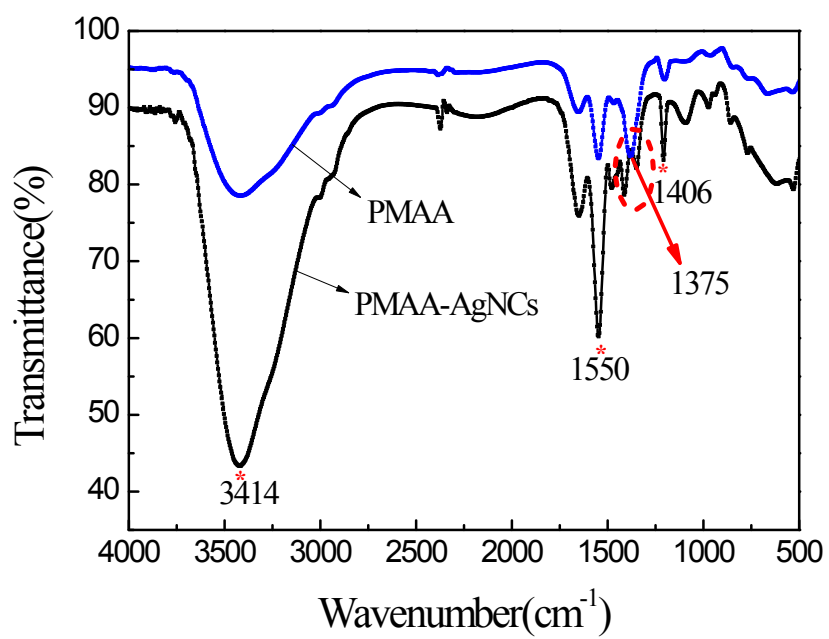

**Fig. S5** The FTIR spectrum of the as-prepared PMAA-AgNCs.

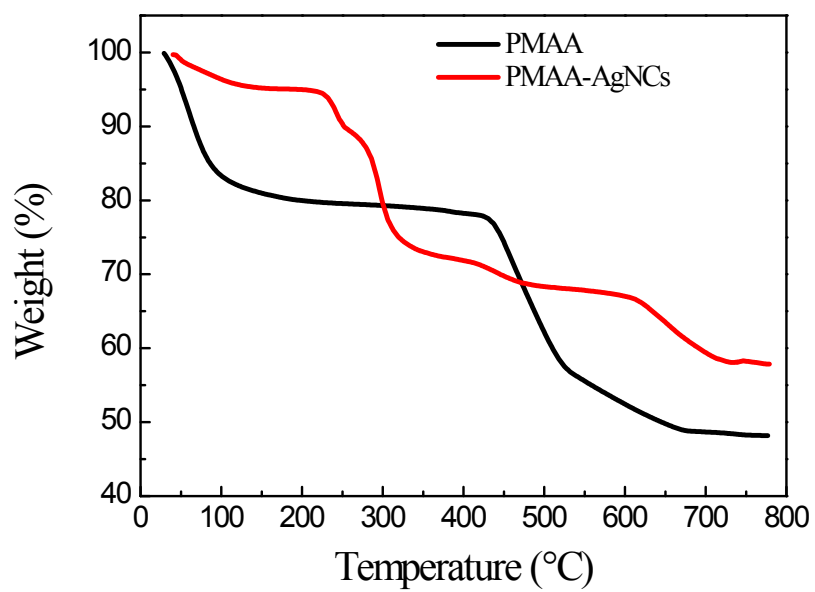

**Fig. S6** The TGA analysis of PMAA and as-prepared PMAA-AgNCs in air.

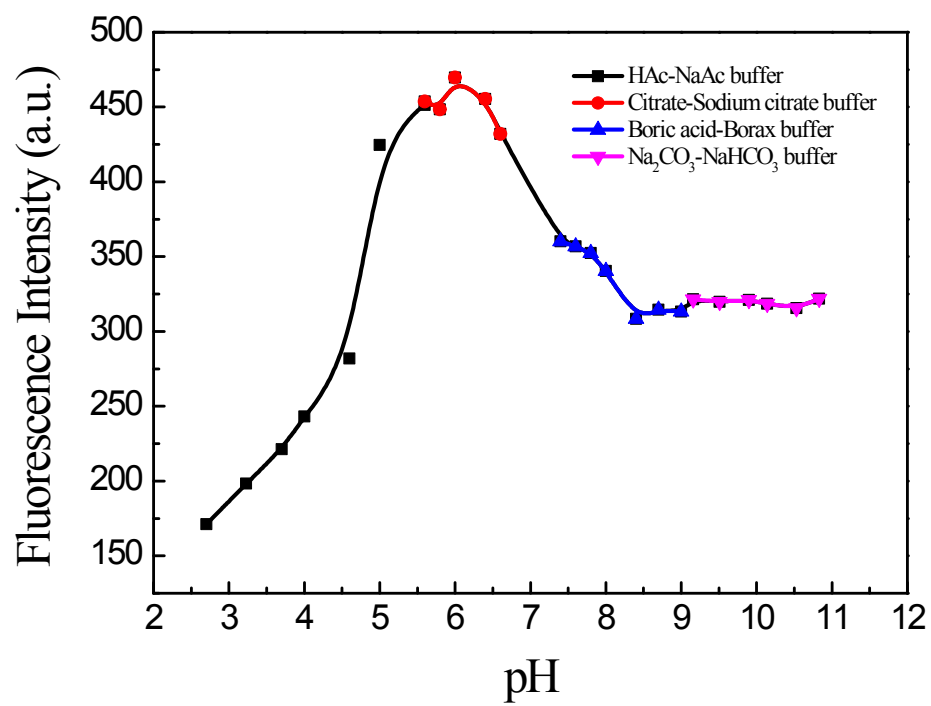

**Fig. S7** Fluorescence intensity of PMAA-templated AgNCs measured at 579 nm for different pH.



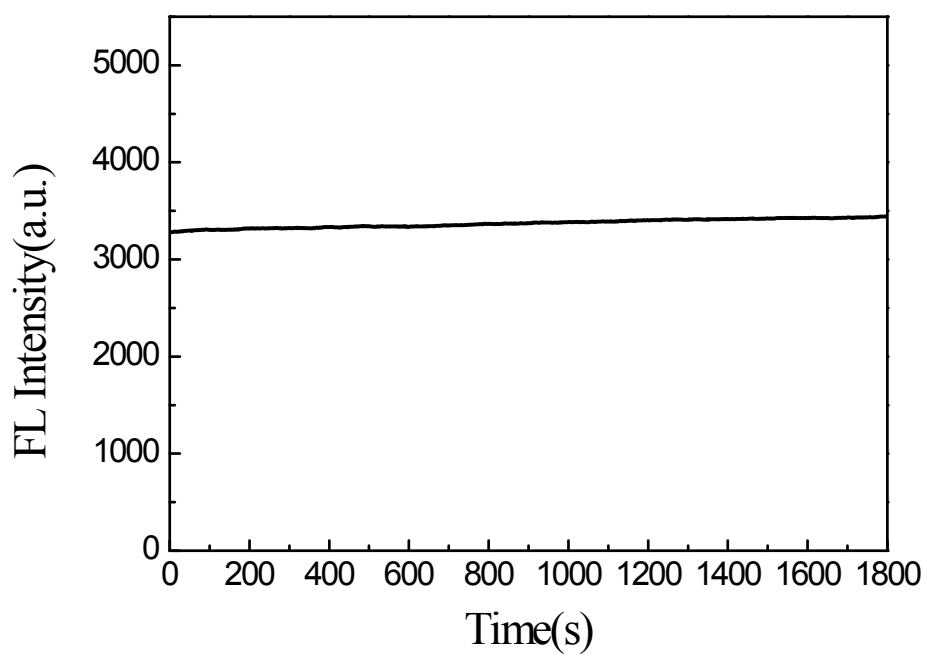

**Fig. S8** Fluorescence intensity of PMAA-templated Ag NCs measured at 579 nm for continuous excitation.

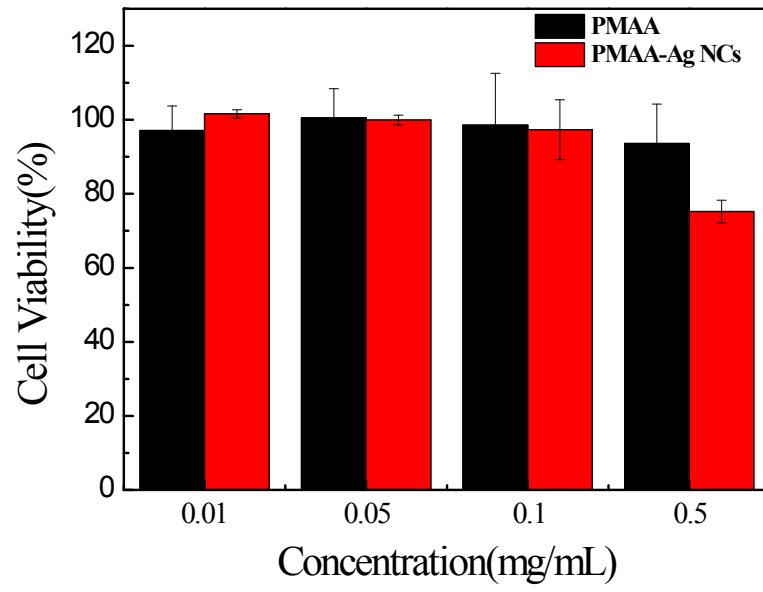

**Fig. S9** Cellular toxicity of AgNCs (Cell viability by Hep-2).

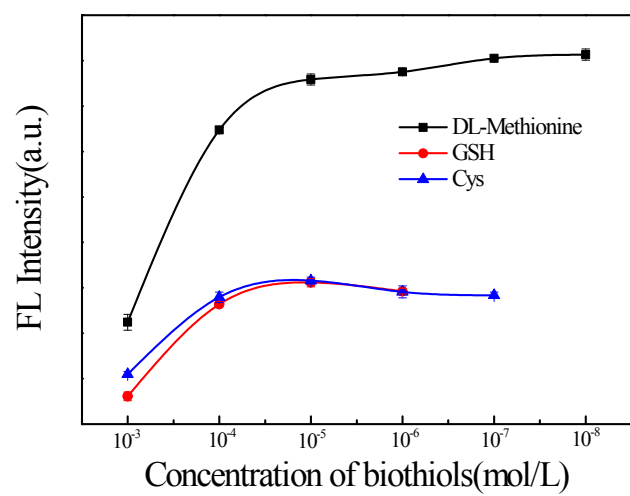

**Fig. S10** The fluorescence emission spectra of the as-prepared PMAA-AgNCs in the presence of biothiols with various concentrations.

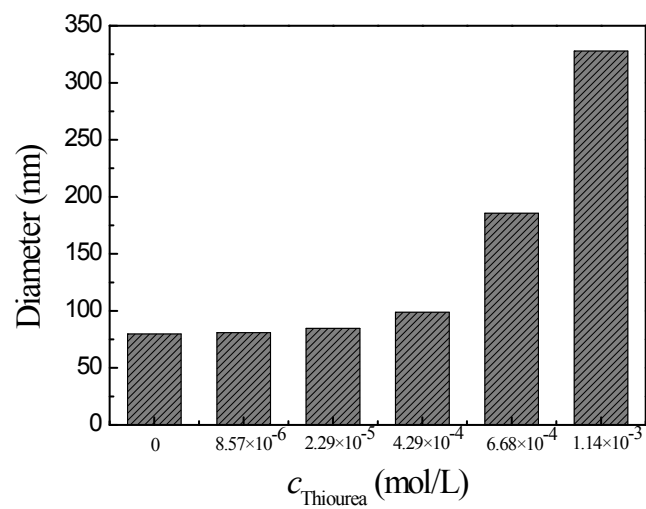

**Fig. S11** The average hydrodynamic diameter of AgNCs without and with different concentrations of thiourea.

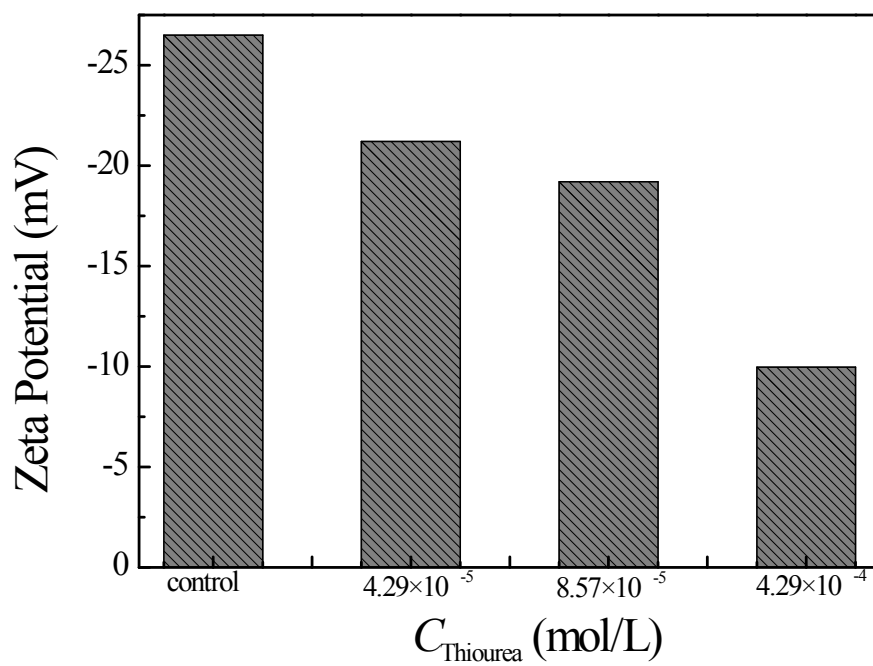

**Fig. S12** The zeta potentials of PMAA-AgNCs without and with different concentrations of thiourea.
